# Supplementary material
Source: publisher site journal article supplement (https://www.spandidos-publications.com/3835/downloadSupplementary)
Supplement: Supplementary file 1 [file downloadSupplementary]

Figure S1. Semi-quantification of the immunofluorescence intensity for the control, and IV and IP routes in the rAAV8-CAG-EGFP group. The data are presented as the mean  $\pm$  SEM. n=3. \*P<0.05 vs. control. rAAV, recombinant adeno-associated virus; IV, intravenous; IP, intraperitoneal; CAG, cytomegalovirus immediate-early enhancer/chicken  $\beta$ -actin; EGFP, enhanced green fluorescent protein.

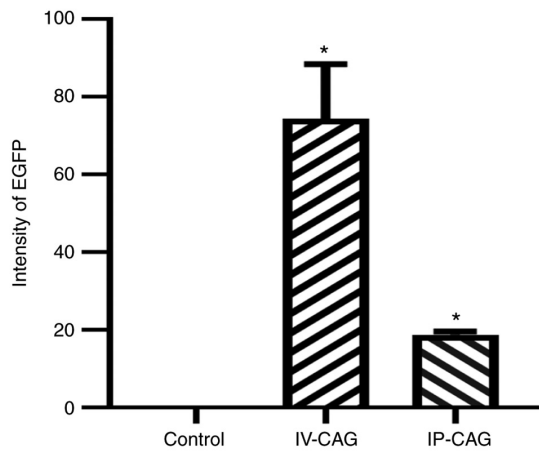

Figure S2. Histopathological analysis of liver tissues showed no notable cellular damage and inflammatory response. Representative H&E staining images at (A) x100 and (B) x400 magnification in the control group. Representative H&E staining images at x400 magnification via the (C) IV and (D) IP routes in rAAV8-CAG-EGFP group. Representative H&E staining images at x400 magnification via the (E) IV and (F) IP routes in the rAAV8-TBG669-EGFP group. Representative H&E staining images at of x400 magnification via the (G) IV and (H) IP routes in rAAV8-TBG410-EGFP group. H&E, hematoxylin and eosin; rAAV, recombinant adeno-associated virus; IV, intravenous; IP, intraperitoneal; CAG, cytomegalovirus immediate-early enhancer/chicken  $\beta$ -actin; EGFP, enhanced green fluorescent protein; TBG, thyroxine-binding globulin promoter.

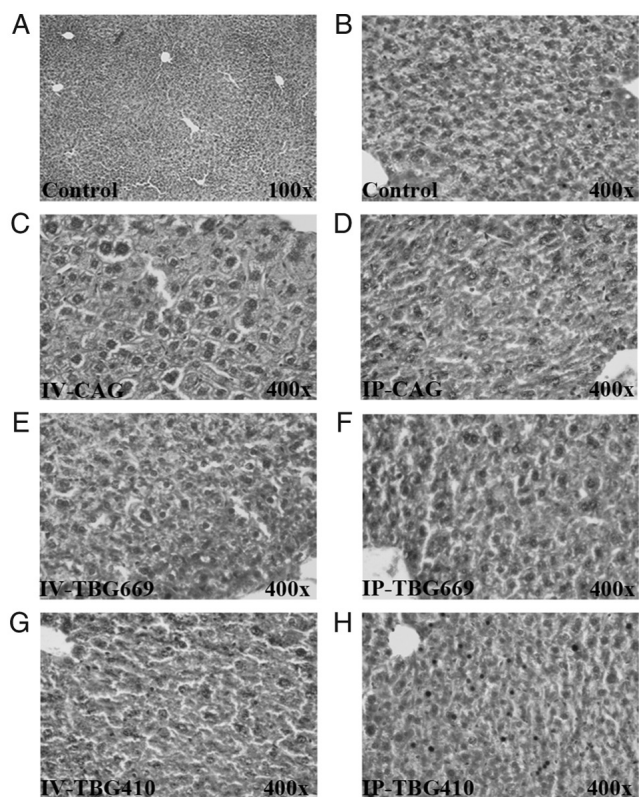

Table SI. Primers sequences used for reverse transcription-quantitative PCR.

| Gene                           | Forward sequence (5'-3') | Reverse sequence (5'-3') | Size of product, bp |
|--------------------------------|--------------------------|--------------------------|---------------------|
| <i>Cxcl2</i>                   | CCAACCACCAGGCTACAGG      | GCGTCACACTCAAGCTCTG      | 108                 |
| <i>Tnf-<math>\alpha</math></i> | AGGGTCTGGGCCATAGAACT     | CCACCACGCTCTTCT          | 103                 |
| <i>Socs3</i>                   | AACTTGCTGTGGGTGACCAT     | AAGGCCGGAGATTTCGCT       | 136                 |
| <i>Fga</i>                     | CAACTCTTGGGCCACGTACT     | GGGTCACCTGCCTCATCTT      | 108                 |
| <i>18S rRNA</i>                | ATTGGAGCTGGAATTACCGC     | CGGCTACCACATCCAAGGAA     | 102                 |

*Cxcl2*, chemokine ligand 2; *Tnf- $\alpha$* , tumor necrosis factor- $\alpha$ ; *Socs3*, suppressor of cytokine signaling 3; *Fga*, fibrinogen  $\alpha$  chain; *rRNA*, ribosomal RNA.
